# Supplementary material for: Unravelling the Evolutionary Dynamics of High-Risk Klebsiella pneumoniae ST147 Clones: Insights from Comparative Pangenome Analysis
Source: MDPI journal article supplement (doi:10.3390/genes14051037), 2023-05-02
Supplement: s1 [file s1]

**Supplementary Table S5:** A summary of the evolutionary clock rate obtained for each of the models in BEAST analysis.

| Parameters                  | Strict Clock                                      |                                                   | Uncorrelated relaxed Clock        |                                                  |                                                  |                                   |                                                  |                                                   |
|-----------------------------|---------------------------------------------------|---------------------------------------------------|-----------------------------------|--------------------------------------------------|--------------------------------------------------|-----------------------------------|--------------------------------------------------|---------------------------------------------------|
|                             | Skyline                                           | Skygrid                                           | Skyline                           |                                                  |                                                  | Skygrid                           |                                                  |                                                   |
|                             |                                                   |                                                   | lognormal                         | gamma                                            | exponential                                      | lognormal                         | gamma                                            | exponential                                       |
| Mean                        | $4.80 \times 10^{-5}$                             | $1.53 \times 10^{-6}$                             | $6.58 \times 10^{-3}$             | $1.21 \times 10^{-4}$                            | $2.56 \times 10^{-4}$                            | $5.93 \times 10^{-3}$             | $3.30 \times 10^{-4}$                            | $1.89 \times 10^{-5}$                             |
| Std. of mean                | $5.22 \times 10^{-5}$                             | $4.14 \times 10^{-7}$                             | $3.49 \times 10^{-4}$             | $3.37 \times 10^{-6}$                            | $1.11 \times 10^{-5}$                            | $2.43 \times 10^{-4}$             | $9.66 \times 10^{-6}$                            | $6.40 \times 10^{-6}$                             |
| Stdev.                      | $4.14 \times 10^{-5}$                             | $6.83 \times 10^{-6}$                             | $4.28 \times 10^{-3}$             | $2.52 \times 10^{-5}$                            | $1.47 \times 10^{-4}$                            | $3.53 \times 10^{-3}$             | $6.31 \times 10^{-5}$                            | $8.28 \times 10^{-5}$                             |
| Variance                    | $1.72 \times 10^{-9}$                             | $4.67 \times 10^{-11}$                            | $1.83 \times 10^{-5}$             | $6.35 \times 10^{-10}$                           | $2.16 \times 10^{-8}$                            | $1.24 \times 10^{-5}$             | $3.98 \times 10^{-9}$                            | $6.85 \times 10^{-9}$                             |
| Median                      | $4.26 \times 10^{-5}$                             | $1.56 \times 10^{-11}$                            | $5.80 \times 10^{-3}$             | $1.18 \times 10^{-4}$                            | $2.35 \times 10^{-4}$                            | $5.41 \times 10^{-3}$             | $3.25 \times 10^{-4}$                            | $2.16 \times 10^{-11}$                            |
| Value range                 | $[2.6413 \times 10^{-14}, 2.4992 \times 10^{-4}]$ | $[2.7432 \times 10^{-34}, 1.3039 \times 10^{-4}]$ | $[1.643 \times 10^{-5}, 0.029]$   | $[3.1686 \times 10^{-5}, 2.2677 \times 10^{-4}]$ | $[1.0228 \times 10^{-7}, 1.1107 \times 10^{-3}]$ | $[9.0478 \times 10^{-6}, 0.0295]$ | $[1.7571 \times 10^{-4}, 4.8942 \times 10^{-4}]$ | $[2.3661 \times 10^{-48}, 1.3272 \times 10^{-3}]$ |
| Geometric mean              | $7.76 \times 10^{-6}$                             | $6.96 \times 10^{-13}$                            | $5.05 \times 10^{-3}$             | $1.19 \times 10^{-4}$                            | $2.05 \times 10^{-4}$                            | $4.78 \times 10^{-3}$             | $3.24 \times 10^{-4}$                            | $9.36 \times 10^{-13}$                            |
| 95% HPD interval            | $[2.6413 \times 10^{-14}, 1.2255 \times 10^{-4}]$ | $[2.7432 \times 10^{-34}, 7.9661 \times 10^{-6}]$ | $[2.0114 \times 10^{-5}, 0.0147]$ | $[7.5745 \times 10^{-5}, 1.8481 \times 10^{-4}]$ | $[3.2822 \times 10^{-7}, 5.3588 \times 10^{-4}]$ | $[1.1082 \times 10^{-4}, 0.0126]$ | $[2.3647 \times 10^{-4}, 4.5442 \times 10^{-4}]$ | $[2.3661 \times 10^{-48}, 9.3881 \times 10^{-5}]$ |
| Auto-correlation time (ACT) | $1.43 \times 10^6$                                | $3.31 \times 10^5$                                | $5.99 \times 10^5$                | $1.61 \times 10^6$                               | $5.13 \times 10^5$                               | $4.28 \times 10^5$                | $2.11 \times 10^6$                               | $5.38 \times 10^5$                                |
| Effective sample size (ESS) | 63                                                | 272                                               | 150.2                             | 56.1                                             | 175.6                                            | 210.1                             | 42.6                                             | 167.2                                             |
